# Supplementary material
Source: Springer Nature journal article supplement (https://www.springermedizin.de/resource/supplementary/12884_2012_555_MOESM3_ESM.pdf/9457958)
Supplement: MOESM3 [file 9457958]

# Without LMWH

# With LMWH

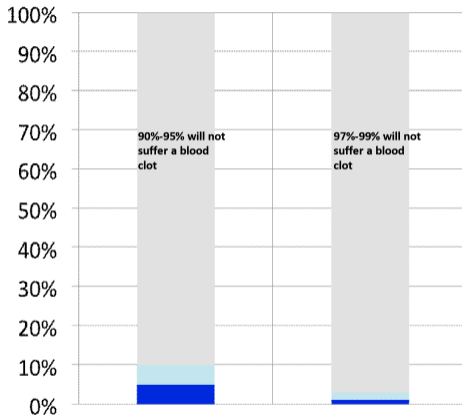

If 100 women like you do not take LMWH

Between 5-10 women will experience a blood clot as indicated by the blue area

Since 5-10 women will experience a blood clot, that means between 90-95 will not

If 100 women like you take LMWH

Between 1-3 women will experience a blood clot as indicated by the blue area

Since 1-3 women will experience a blood clot, that means between 97-99 will not

There may be an increase in the risk of major bleeding, osteoporosis, and heparin-induced thrombocytopenia with preventative blood thinning. If there is an increased risk, it is likely to be small and less than 1 in 100.
